# Supplementary material for: Human settlement history between Sunda and Sahul: a focus on East Timor (Timor-Leste) and the Pleistocenic mtDNA diversity
Source: PubMed Central journal article supplement (PMC4342813; doi:10.1186/s12864-014-1201-x), 2015-02-14
Supplement: 12864_2014_1201_MOESM8_ESM.pdf [file 12864_2014_1201_MOESM8_ESM.pdf]

**Additional File 8: Intra-population comparisons for East Timor and 10 surrounding populations based on HVS-I and HVS-II**

reading frame: nps 16080-16193 16194-16365 73-300

**Part A: Design and results of AMOVA**

| Source of variation | d.f. | Sum of squares | Variance components | Percentage of variation |
|---------------------|------|----------------|---------------------|-------------------------|
| Among populations   | 10   | 783,765        | 0.25597 Va          | 4,86                    |
| Within populations  | 3265 | 16350,495      | 5.00781 Vb          | 95,14                   |
| Total               | 3275 | 17134,26       | 5,26378             |                         |

p-value (Va): < 0.001

**Part B: Mean pairwise differences**

| Population                                 | East Timor   | PNG          | Vietnam      | South Korea | Hainan       | Philippines  | Taiwan      | Peninsular Malaysia | Mixed Han (China) | Thailand    | Laos         |
|--------------------------------------------|--------------|--------------|--------------|-------------|--------------|--------------|-------------|---------------------|-------------------|-------------|--------------|
| <b>1A - East Timor</b>                     | <b>10,70</b> | <b>12,78</b> | 10,90        | 10,54       | 10,96        | <b>10,15</b> | 10,59       | 10,87               | 11,01             | 10,87       | 10,96        |
| <b>21 - PNG</b>                            | <b>1,48</b>  | <b>11,88</b> | 13,36        | 13,05       | 13,38        | 12,62        | 13,22       | 13,32               | <b>13,52</b>      | 13,32       | 13,42        |
| <b>13 - Vietnam</b>                        | 0,50         | 2,37         | <b>10,10</b> | 10,10       | 10,31        | 9,93         | 10,22       | 10,34               | 10,47             | 10,08       | 10,14        |
| <b>16 - South Korea</b>                    | 0,50         | 2,42         | 0,36         | <b>9,37</b> | 10,20        | <b>9,45</b>  | 10,03       | 10,03               | 9,96              | 10,02       | 10,18        |
| <b>18 - Hainan</b>                         | 0,45         | 2,28         | 0,10         | 0,36        | <b>10,31</b> | 9,97         | 10,30       | 10,47               | 10,58             | 10,29       | 10,35        |
| <b>12 - Philippines</b>                    | <b>0,26</b>  | 2,14         | 0,34         | 0,23        | 0,27         | <b>9,08</b>  | 9,59        | 9,85                | 9,98              | 9,90        | 9,99         |
| <b>17 - Taiwan</b>                         | 0,41         | <b>2,46</b>  | 0,35         | 0,53        | 0,32         | <b>0,23</b>  | <b>9,64</b> | 10,35               | 10,45             | 10,19       | 10,24        |
| <b>8 - Peninsular Malaysia (Singapore)</b> | 0,34         | 2,20         | 0,11         | 0,17        | 0,14         | 0,14         | 0,35        | <b>10,35</b>        | 10,49             | 10,32       | 10,41        |
| <b>19 - Mixed Han (China)</b>              | 0,42         | 2,34         | 0,18         | 0,04        | 0,19         | 0,20         | 0,39        | 0,08                | <b>10,48</b>      | 10,40       | 10,56        |
| <b>15 - Thailand</b>                       | 0,54         | 2,40         | 0,05         | 0,35        | 0,15         | 0,38         | 0,39        | 0,16                | 0,18              | <b>9,96</b> | 10,14        |
| <b>14 - Laos</b>                           | 0,51         | 2,39         | <b>0,00</b>  | 0,41        | 0,10         | 0,36         | 0,33        | 0,14                | 0,23              | 0,06        | <b>10,18</b> |

Values above diagonal: Average number of pairwise differences between populations (PIX)

Diagonal elements: Average number of pairwise differences within populations (PiX)

Values below diagonal: Corrected number of average pairwise differences between populations (PiXY-(PiX+PiY)/2)

Lowest and highest values are highlighted in green and red, resp.

Values concerning the East Timor sample are highlighted in grey (lows and highs are bold)

**Part C: FST comparisons**

| Population                                 | East Timor | PNG            | Vietnam | South Korea    | Hainan  | Philippines    | Taiwan  | Peninsular Malaysia | Mixed Han (China) | Thailand | Laos            |
|--------------------------------------------|------------|----------------|---------|----------------|---------|----------------|---------|---------------------|-------------------|----------|-----------------|
| <b>1A - East Timor</b>                     | *          | <b>0,11835</b> | 0,04524 | 0,04841        | 0,04085 | <b>0,02423</b> | 0,03968 | 0,03128             | 0,03809           | 0,04878  | 0,04656         |
| <b>21 - PNG</b>                            | < 0.001    | *              | 0,17886 | <b>0,19885</b> | 0,17412 | 0,16866        | 0,19714 | 0,16719             | 0,17594           | 0,18216  | 0,18038         |
| <b>13 - Vietnam</b>                        | < 0.001    | < 0.001        | *       | 0,0367         | 0,00971 | 0,03366        | 0,03479 | 0,01032             | 0,01728           | 0,00474  | <b>-0,00009</b> |
| <b>16 - South Korea</b>                    | < 0.001    | < 0.001        | < 0.001 | *              | 0,03598 | 0,02347        | 0,05243 | 0,01768             | 0,00412           | 0,03575  | 0,04086         |
| <b>18 - Hainan</b>                         | < 0.001    | < 0.001        | < 0.001 | < 0.001        | *       | 0,02606        | 0,03125 | 0,013               | 0,01774           | 0,01416  | 0,00928         |
| <b>12 - Philippines</b>                    | < 0.001    | < 0.001        | < 0.001 | < 0.001        | < 0.001 | *              | 0,02362 | 0,01359             | 0,01975           | 0,03753  | 0,03563         |
| <b>17 - Taiwan</b>                         | < 0.001    | < 0.001        | < 0.001 | < 0.001        | < 0.001 | < 0.001        | *       | 0,03501             | 0,03773           | 0,03861  | 0,03225         |
| <b>8 - Peninsular Malaysia (Singapore)</b> | < 0.001    | < 0.001        | < 0.001 | < 0.001        | < 0.001 | < 0.001        | < 0.001 | *                   | 0,00733           | 0,01584  | 0,01373         |
| <b>19 - Mixed Han (China)</b>              | < 0.001    | < 0.001        | < 0.001 | < 0.001        | < 0.001 | < 0.001        | < 0.001 | < 0.001             | *                 | 0,01696  | 0,02131         |
| <b>15 - Thailand</b>                       | < 0.001    | < 0.001        | 0,00901 | < 0.001        | < 0.001 | < 0.001        | < 0.001 | < 0.001             | < 0.001           | *        | 0,00612         |
| <b>14 - Laos</b>                           | < 0.001    | < 0.001        | 0,36036 | < 0.001        | 0,00901 | < 0.001        | < 0.001 | < 0.001             | < 0.001           | < 0.001  | *               |

Values above diagonal: population pairwise  $F_{ST}$  values

Lowest and highest values are highlighted in green and red, resp.

Values below diagonal: p-values (significance level=0,05; 1023 permutations)

East Timor values are highlighted in grey, maximum and minimum vales bold

p value above 0.05 is highlighted in yellow
