# Supplementary material for: Human settlement history between Sunda and Sahul: a focus on East Timor (Timor-Leste) and the Pleistocenic mtDNA diversity
Source: BMC Genomics. 2015 Feb 14;16(1):70. doi: 10.1186/s12864-014-1201-x (PMC4342813; doi:10.1186/s12864-014-1201-x)
Supplement: Additional file 10: — Intra-population comparisons for East Timor and 24 surrounding populations based on HVS-I. Part A: Design and results of AMOVA. Part B: Mean pairwise differences. Part C: F ST comparisons. [file 12864_2014_1201_MOESM10_ESM.pdf]

Additional file 10: Intra-population comparisons for East Timor and 24 surrounding populations based on HVS-I

reading frame: nps 16080-16180 16195-16354

Part A: Design and results of AMOVA

|                     |      |                |                     |                         |
|---------------------|------|----------------|---------------------|-------------------------|
| Source of variation | d.f. | Sum of squares | Variance components | Percentage of variation |
| Among populations   | 24   | 3385,858       | 0.37056 Va          | 12,44                   |
| Within populations  | 9609 | 25061,382      | 2.60812 Vb          | 87,56                   |
| Total               | 9633 | 28447,240      | 2,97868             |                         |

p-value (Va): < 0.001

Part B: Mean pairwise differences

| Population                  | East Timor | Nusa Tenggara | Java | Bali | Philippines | Sulawesi | Borneo | Moluccas | Sumatra | Peninsular Malaysia | South Korea | Taiwan | Hainan | Mixed Han (China) | Vietnam | Laos | Thailand | WNG  | PNG  | Admiralty Islands | Solomons | Polynesia | Australia | Mentawai | Nias |
|-----------------------------|------------|---------------|------|------|-------------|----------|--------|----------|---------|---------------------|-------------|--------|--------|-------------------|---------|------|----------|------|------|-------------------|----------|-----------|-----------|----------|------|
| 1 - East Timor              | 5,98       | 5,96          | 5,96 | 6,08 | 5,70        | 5,57     | 5,81   | 5,74     | 5,93    | 6,50                | 5,74        | 5,85   | 5,90   | 6,02              | 5,97    | 6,08 | 6,04     | 8,16 | 7,11 | 6,41              | 6,08     | 6,00      | 5,65      | 5,86     | 6,07 |
| 2 - Nusa Tenggara           | 0,07       | 5,82          | 5,75 | 5,89 | 5,56        | 5,44     | 5,65   | 5,63     | 5,74    | 6,28                | 5,52        | 5,70   | 5,68   | 5,81              | 5,74    | 5,85 | 5,80     | 8,37 | 7,21 | 6,52              | 6,11     | 6,09      | 5,49      | 5,65     | 5,93 |
| 4 - Java                    | 0,19       | 0,06          | 5,57 | 5,78 | 5,48        | 5,35     | 5,52   | 5,60     | 5,59    | 6,11                | 5,37        | 5,62   | 5,53   | 5,65              | 5,58    | 5,70 | 5,64     | 8,54 | 7,32 | 6,65              | 6,18     | 6,21      | 5,35      | 5,52     | 5,82 |
| 3 - Bali                    | 0,27       | 0,16          | 0,17 | 5,64 | 5,46        | 5,38     | 5,60   | 5,72     | 5,69    | 6,26                | 5,51        | 5,64   | 5,64   | 5,80              | 5,70    | 5,80 | 5,82     | 9,01 | 7,59 | 6,68              | 6,07     | 6,00      | 5,43      | 5,50     | 5,76 |
| 12 - Philippines            | 0,18       | 0,12          | 0,17 | 0,11 | 5,05        | 5,03     | 5,25   | 5,37     | 5,37    | 5,96                | 5,19        | 5,22   | 5,34   | 5,48              | 5,45    | 5,56 | 5,52     | 8,73 | 7,32 | 6,22              | 5,52     | 5,39      | 5,07      | 5,16     | 5,34 |
| 10 - Sulawesi               | 0,18       | 0,13          | 0,16 | 0,15 | 0,10        | 4,80     | 5,12   | 5,22     | 5,27    | 5,80                | 4,95        | 5,26   | 5,24   | 5,29              | 5,33    | 5,45 | 5,42     | 8,41 | 7,12 | 6,12              | 5,48     | 5,44      | 4,86      | 5,16     | 5,49 |
| 9 - Borneo                  | 0,15       | 0,07          | 0,07 | 0,11 | 0,05        | 0,04     | 5,35   | 5,45     | 5,47    | 6,02                | 5,20        | 5,43   | 5,43   | 5,51              | 5,53    | 5,63 | 5,59     | 8,61 | 7,31 | 6,36              | 5,74     | 5,68      | 5,14      | 5,33     | 5,61 |
| 11 - Moluccas               | 0,04       | 0,01          | 0,10 | 0,18 | 0,13        | 0,10     | 0,06   | 5,43     | 5,55    | 6,12                | 5,32        | 5,52   | 5,52   | 5,62              | 5,56    | 5,67 | 5,64     | 8,06 | 6,93 | 6,03              | 5,59     | 5,48      | 5,31      | 5,52     | 5,76 |
| 5 - Sumatra                 | 0,18       | 0,07          | 0,05 | 0,11 | 0,08        | 0,11     | 0,03   | 0,08     | 5,52    | 6,13                | 5,32        | 5,54   | 5,52   | 5,62              | 5,60    | 5,71 | 5,67     | 8,70 | 7,37 | 6,51              | 5,93     | 5,90      | 5,26      | 5,36     | 5,57 |
| 8 - Penins. Malaysia        | 0,33       | 0,19          | 0,15 | 0,27 | 0,26        | 0,23     | 0,17   | 0,24     | 0,19    | 6,35                | 5,87        | 6,15   | 6,05   | 6,15              | 6,05    | 6,18 | 6,12     | 9,38 | 8,03 | 7,26              | 6,69     | 6,73      | 5,87      | 5,96     | 6,47 |
| 16 - South Korea            | 0,33       | 0,19          | 0,16 | 0,26 | 0,24        | 0,12     | 0,10   | 0,19     | 0,13    | 0,27                | 4,85        | 5,40   | 5,26   | 5,21              | 5,35    | 5,48 | 5,43     | 8,42 | 7,13 | 6,33              | 5,80     | 5,85      | 4,92      | 5,23     | 5,64 |
| 17 - Taiwan                 | 0,27       | 0,20          | 0,23 | 0,22 | 0,09        | 0,25     | 0,16   | 0,21     | 0,18    | 0,38                | 0,37        | 5,20   | 5,47   | 5,65              | 5,59    | 5,69 | 5,65     | 8,80 | 7,38 | 6,28              | 5,55     | 5,37      | 5,29      | 5,42     | 5,51 |
| 18 - Hainan                 | 0,24       | 0,11          | 0,08 | 0,15 | 0,14        | 0,17     | 0,09   | 0,14     | 0,09    | 0,21                | 0,16        | 0,21   | 5,34   | 5,52              | 5,46    | 5,57 | 5,53     | 8,76 | 7,41 | 6,56              | 6,00     | 5,97      | 5,24      | 5,45     | 5,73 |
| 19 - Mixed Han              | 0,27       | 0,13          | 0,10 | 0,21 | 0,18        | 0,12     | 0,07   | 0,14     | 0,09    | 0,21                | 0,02        | 0,28   | 0,08   | 5,53              | 5,60    | 5,73 | 5,67     | 8,74 | 7,44 | 6,64              | 6,10     | 6,12      | 5,26      | 5,54     | 5,90 |
| 13 - Vietnam                | 0,26       | 0,11          | 0,07 | 0,16 | 0,20        | 0,20     | 0,13   | 0,13     | 0,12    | 0,15                | 0,21        | 0,27   | 0,06   | 0,12              | 5,45    | 5,56 | 5,53     | 8,79 | 7,46 | 6,62              | 6,10     | 6,09      | 5,39      | 5,56     | 5,92 |
| 14 - Laos                   | 0,25       | 0,10          | 0,07 | 0,14 | 0,19        | 0,20     | 0,11   | 0,12     | 0,10    | 0,16                | 0,21        | 0,24   | 0,05   | 0,12              | 4,91    | 5,69 | 5,65     | 8,90 | 7,57 | 6,71              | 6,16     | 6,13      | 5,48      | 5,67     | 6,00 |
| 15 - Thailand               | 0,26       | 0,10          | 0,06 | 0,20 | 0,20        | 0,22     | 0,12   | 0,13     | 0,11    | 0,15                | 0,21        | 0,26   | 0,07   | 0,11              | 0,01    | 0,01 | 5,58     | 8,85 | 7,52 | 6,71              | 6,20     | 6,19      | 5,42      | 5,61     | 5,97 |
| 20 - WNG                    | 1,65       | 1,94          | 2,23 | 2,66 | 2,68        | 2,48     | 2,42   | 1,83     | 2,41    | 2,68                | 2,47        | 2,68   | 2,56   | 2,45              | 2,55    | 2,54 | 2,53     | 7,04 | 7,19 | 8,28              | 9,30     |           | 8,52      | 8,73     | 8,85 |
| 21 - PNG                    | 0,76       | 0,94          | 1,17 | 1,41 | 1,42        | 1,35     | 1,27   | 0,85     | 1,24    | 1,49                | 1,34        | 1,42   | 1,38   | 1,30              | 1,38    | 1,36 | 1,36     | 0,30 | 6,73 | 7,31              | 7,85     | 8,02      | 7,15      | 7,29     | 7,45 |
| 22 - Admiralty Islands      | 0,57       | 0,76          | 1,02 | 1,01 | 0,85        | 0,87     | 0,84   | 0,48     | 0,90    | 1,24                | 1,06        | 0,83   | 1,05   | 1,02              | 1,05    | 1,02 | 1,08     | 1,91 | 1,10 | 5,69              | 5,11     | 4,63      | 6,33      | 6,56     | 6,52 |
| 23 - Solomons               | 1,26       | 1,37          | 1,57 | 1,42 | 1,17        | 1,25     | 1,24   | 1,04     | 1,34    | 1,68                | 1,54        | 1,12   | 1,50   | 1,50              | 1,55    | 1,49 | 1,58     | 3,95 | 2,65 | 0,44              | 3,66     | 2,89      | 5,70      | 6,02     | 5,89 |
| 24 - Polynesia              | 2,12       | 2,29          | 2,53 | 2,28 | 1,97        | 2,14     | 2,11   | 1,88     | 2,24    | 2,66                | 2,53        | 1,88   | 2,40   | 2,46              | 2,47    | 2,39 | 2,51     | 5,18 | 3,76 | 0,89              | 0,16     | 1,79      | 5,71      | 6,03     | 5,71 |
| 25 - Australia (Indigenous) | 0,39       | 0,31          | 0,28 | 0,33 | 0,27        | 0,18     | 0,19   | 0,32     | 0,22    | 0,42                | 0,22        | 0,42   | 0,29   | 0,22              | 0,39    | 0,36 | 0,35     | 2,72 | 1,50 | 1,21              | 1,59     | 2,54      | 4,56      | 5,12     | 5,46 |
| 6 - Mentawai                | 0,53       | 0,40          | 0,39 | 0,34 | 0,29        | 0,41     | 0,32   | 0,46     | 0,25    | 0,44                | 0,46        | 0,48   | 0,43   | 0,43              | 0,49    | 0,48 | 0,48     | 2,86 | 1,58 | 1,37              | 1,84     | 2,79      | 0,50      | 4,69     | 5,11 |
| 7 - Nias                    | 0,70       | 0,64          | 0,65 | 0,55 | 0,43        | 0,71     | 0,55   | 0,66     | 0,43    | 0,91                | 0,83        | 0,53   | 0,68   | 0,75              | 0,81    | 0,77 | 0,79     | 2,95 | 1,70 | 1,29              | 1,67     | 2,43      | 0,80      | 0,38     | 4,77 |

Values above diagonal: Average number of pairwise differences between populations (PIXY)  
Diagonal elements: Average number of pairwise differences within populations (PIX)  
Values below diagonal: Corrected number of average pairwise differences between populatons (PIXY-(PIX+PIY)/2)  
Lowest and highest values are highlighted in green and red, resp.  
Values concerning the East Timor sample are highlightd in grey (lows and highs are bold)

Part C: FST comparisons

| Population           | East Timor | Nusa Tenggara | Java    | Bali    | Philippines | Sulawesi | Borneo  | Moluccas | Sumatra | Peninsular Malaysia | South Korea | Taiwan  | Hainan  | Mixed Han (China) | Vietnam | Laos    | Thailand | WNG     | PNG   | Admiralty Islands | Solomons | Polynesia | Australia | Mentawai | Nias  |
|----------------------|------------|---------------|---------|---------|-------------|----------|---------|----------|---------|---------------------|-------------|---------|---------|-------------------|---------|---------|----------|---------|-------|-------------------|----------|-----------|-----------|----------|-------|
| 1 - East Timor       | *          | 0,011         | 0,031   | 0,044   | 0,033       | 0,033    | 0,026   | 0,005    | 0,030   | 0,051               | 0,059       | 0,047   | 0,040   | 0,044             | 0,043   | 0,041   | 0,042    | 0,205   | 0,109 | 0,089             | 0,221    | 0,358     | 0,065     | 0,085    | 0,117 |
| 2 - Nusa Tenggara    | < 0.001    | *             | 0,009   | 0,027   | 0,021       | 0,022    | 0,012   | 0,002    | 0,012   | 0,032               | 0,032       | 0,034   | 0,018   | 0,022             | 0,018   | 0,017   | 0,017    | 0,246   | 0,137 | 0,116             | 0,209    | 0,311     | 0,050     | 0,064    | 0,103 |
| 4 - Java             | < 0.001    | < 0.001       | *       | 0,030   | 0,033       | 0,032    | 0,012   | 0,018    | 0,008   | 0,024               | 0,032       | 0,043   | 0,014   | 0,018             | 0,012   | 0,012   | 0,011    | 0,252   | 0,155 | 0,153             | 0,288    | 0,501     | 0,054     | 0,072    | 0,118 |
| 3 - Bali             | < 0.001    | < 0.001       | < 0.001 | *       | 0,020       | 0,028    | 0,019   | 0,032    | 0,020   | 0,043               | 0,048       | 0,039   | 0,027   | 0,036             | 0,028   | 0,023   | 0,035    | 0,306   | 0,192 | 0,152             | 0,238    | 0,359     | 0,057     | 0,058    | 0,096 |
| 12 - Philippines     | < 0.001    | < 0.001       | < 0.001 | < 0.001 | *           | 0,020    | 0,011   | 0,026    | 0,016   | 0,044               | 0,046       | 0,018   | 0,027   | 0,034             | 0,038   | 0,034   | 0,037    | 0,320   | 0,204 | 0,140             | 0,217    | 0,355     | 0,052     | 0,054    | 0,080 |
| 10 - Sulawesi        | < 0.001    | < 0.001       | < 0.001 | < 0.001 | < 0.001     | *        | 0,009   | 0,021    | 0,021   | 0,039               | 0,025       | 0,048   | 0,033   | 0,023             | 0,040   | 0,039   | 0,043    | 0,308   | 0,200 | 0,146             | 0,234    | 0,388     | 0,036     | 0,079    | 0,129 |
| 9 - Borneo           | < 0.001    | < 0.001       | < 0.001 | < 0.001 | < 0.001     | < 0.001  | *       | 0,011    | 0,006   | 0,027               | 0,020       | 0,030   | 0,016   | 0,012             | 0,024   | 0,020   | 0,022    | 0,275   | 0,171 | 0,132             | 0,239    | 0,431     | 0,037     | 0,059    | 0,101 |
| 11 - Moluccas        | 0,126      | 0,198         | 0,009   | < 0.001 | < 0.001     | < 0.001  | < 0.001 | *        | 0,015   | 0,036               | 0,037       | 0,038   | 0,026   | 0,025             | 0,023   | 0,020   | 0,024    | 0,215   | 0,117 | 0,078             | 0,216    | 0,445     | 0,062     | 0,086    | 0,121 |
| 5 - Sumatra          | < 0.001    | < 0.001       | 0,009   | < 0.001 | < 0.001     | < 0.001  | 0,009   | < 0.001  | *       | 0,031               | 0,026       | 0,033   | 0,017   | 0,016             | 0,021   | 0,018   | 0,020    | 0,278   | 0,169 | 0,138             | 0,246    | 0,416     | 0,041     | 0,046    | 0,079 |
| 8 - Penins. Malaysia | < 0.001    | < 0.001       | < 0.001 | < 0.001 | < 0.001     | < 0.001  | < 0.001 | < 0.001  | < 0.001 | *                   | 0,047       | 0,063   | 0,033   | 0,033             | 0,024   | 0,026   | 0,023    | 0,290   | 0,187 | 0,168             | 0,262    | 0,383     | 0,065     | 0,067    | 0,141 |
| 16 - South Korea     | < 0.001    | < 0.001       | < 0.001 | < 0.001 | < 0.001     | < 0.001  | < 0.001 | < 0.001  | < 0.001 | < 0.001             | *           | 0,069   | 0,032   | 0,003             | 0,040   | 0,040   | 0,040    | 0,314   | 0,203 | 0,173             | 0,266    | 0,403     | 0,043     | 0,087    | 0,147 |
| 17 - Taiwan          | < 0.001    | < 0.001       | < 0.001 | < 0.001 | < 0.001     | < 0.001  | < 0.001 | < 0.001  | < 0.001 | < 0.001             | < 0.001     | *       | 0,038   | 0,051             | 0,049   | 0,044   | 0,047    | 0,322   | 0,204 | 0,136             | 0,201    | 0,320     | 0,075     | 0,085    | 0,096 |
| 18 - Hainan          | < 0.001    | < 0.001       | < 0.001 | < 0.001 | < 0.001     | < 0.001  | < 0.001 | < 0.001  | < 0.001 | < 0.001             | < 0.001     | < 0.001 | *       | 0,015             | 0,012   | 0,009   | 0,012    | 0,297   | 0,189 | 0,160             | 0,265    | 0,421     | 0,054     | 0,077    | 0,120 |
| 19 - Mixed Han       | < 0.001    | < 0.001       | < 0.001 | < 0.001 | < 0.001     | < 0.001  | < 0.001 | < 0.001  | < 0.001 | < 0.001             | < 0.001     | < 0.001 | < 0.001 | 0,015             | 0,021   | 0,021   | 0,019    | 0,282   | 0,177 | 0,155             | 0,265    | 0,429     | 0,040     | 0,076    | 0,130 |
| 13 - Vietnam         | < 0.001    | < 0.001       | 0,009   | < 0.001 | < 0.001     | < 0.001  | < 0.001 | < 0.001  | < 0.001 | < 0.001             | < 0.001     | < 0.001 | < 0.001 | < 0.001           | *       | 0,001   | 0,003    | 0,287   | 0,184 | 0,159             | 0,278    | 0,455     | 0,071     | 0,087    | 0,141 |
| 14 - Laos            | < 0.001    | < 0.001       | < 0.001 | < 0.001 | < 0.001     | < 0.001  | < 0.001 | < 0.001  | < 0.001 | < 0.001             | < 0.001     | < 0.001 | < 0.001 | < 0.001           | 0,838   | *       | 0,002    | 0,284   | 0,180 | 0,152             | 0,265    | 0,431     | 0,064     | 0,082    | 0,132 |
| 15 - Thailand        | < 0.001    | < 0.001       | 0,009   | < 0.001 | < 0.001     | < 0.001  | < 0.001 | < 0.001  | < 0.001 | < 0.001             | < 0.001     | < 0.001 | < 0.001 | < 0.001           | 0,117   | 0,144   | *        | 0,284   | 0,181 | 0,160             | 0,280    | 0,454     | 0,063     | 0,084    | 0,137 |
| 20 - WNG             | < 0.001    | < 0.001       | < 0.001 | < 0.001 | < 0.001     | < 0.001  | < 0.001 | < 0.001  | < 0.001 | < 0.001             | < 0.001     | < 0.001 | < 0.001 | < 0.001           | < 0.001 | < 0.001 | < 0.001  | *       | 0,042 | 0,230             | 0,468    | 0,583     | 0,309     | 0,316    | 0,350 |
| 21 - PNG             | < 0.001    | < 0.001       | < 0.001 | < 0.001 | < 0.001     | < 0.001  | < 0.001 | < 0.001  | < 0.001 | < 0.001             | < 0.001     | < 0.001 | < 0.001 | < 0.001           | < 0.001 | < 0.001 | < 0.001  | < 0.001 | *     | 0,150             | 0,379    | 0,521     | 0,205     | 0,210    | 0,242 |
